# Supplementary material
Source: PubMed Central journal article supplement (PMC3038456)
Supplement: supp_afq158_afq158supp.pdf [file supp_afq158_afq158supp.pdf]

## Appendix 1. Prevalence of High Risk Medication Use at Hospital Discharge (N=359)

| <b><u>High Risk Medications</u></b>        | <b><u>N</u></b> | <b><u>%</u></b> |
|--------------------------------------------|-----------------|-----------------|
| <b><u>Blood Modifiers</u></b>              |                 |                 |
| Antiplatelets                              | 135             | 37.6            |
| Warfarin                                   | 61              | 17.0            |
| <b><u>Cardiac Drugs</u></b>                |                 |                 |
| Angiotensin converting enzyme inhibitors   | 124             | 34.5            |
| Alpha blockers                             | 69              | 19.2            |
| Anti arrhythmics                           | 18              | 5.0             |
| Angiotensin receptor blockers              | 3               | 0.8             |
| Beta blockers                              | 53              | 14.8            |
| Calcium channel blockers                   | 98              | 27.3            |
| Digoxin                                    | 94              | 26.2            |
| Diuretics                                  | 134             | 37.3            |
| Nitrates                                   | 79              | 22.0            |
| <b><u>Central Nervous System Drugs</u></b> |                 |                 |
| Anticholinergics                           | 51              | 14.2            |
| Anticonvulsants                            | 25              | 7.0             |
| Antipsychotics                             | 3               | 0.8             |
| Antidepressants                            | 83              | 23.1            |
| Benzodiazepines                            | 21              | 5.9             |
| Lithium                                    | 0               | 0               |

## Appendix 1. Prevalence of High Risk Medication Use at Hospital Discharge (N=359)

| <b><u>High Risk Medications</u></b> | <b><u>N</u></b> | <b><u>%</u></b> |
|-------------------------------------|-----------------|-----------------|
| Metoclopramide                      | 7               | 2.0             |
| Opioid analgesics                   | 10              | 2.8             |
| Sedative/hypnotics                  | 0               | 0               |
| <b><u>Endocrine</u></b>             |                 |                 |
| Antidiabetics                       | 114             | 31.8            |
| Corticosteroids                     | 55              | 15.3            |
| <b><u>Musculoskeletal</u></b>       |                 |                 |
| Antigout drugs                      | 23              | 6.4             |
| Nonsteroidal antiinflammatory drugs | 27              | 7.5             |
| <b><u>Respiratory</u></b>           |                 |                 |
| Theophylline                        | 18              | 5.0             |
